# Supplementary material
Source: Springer Nature journal article supplement (https://www.springermedizin.de/resource/supplementary/12997_2009_56_MOESM2_ESM.pdf/9623224)

**A**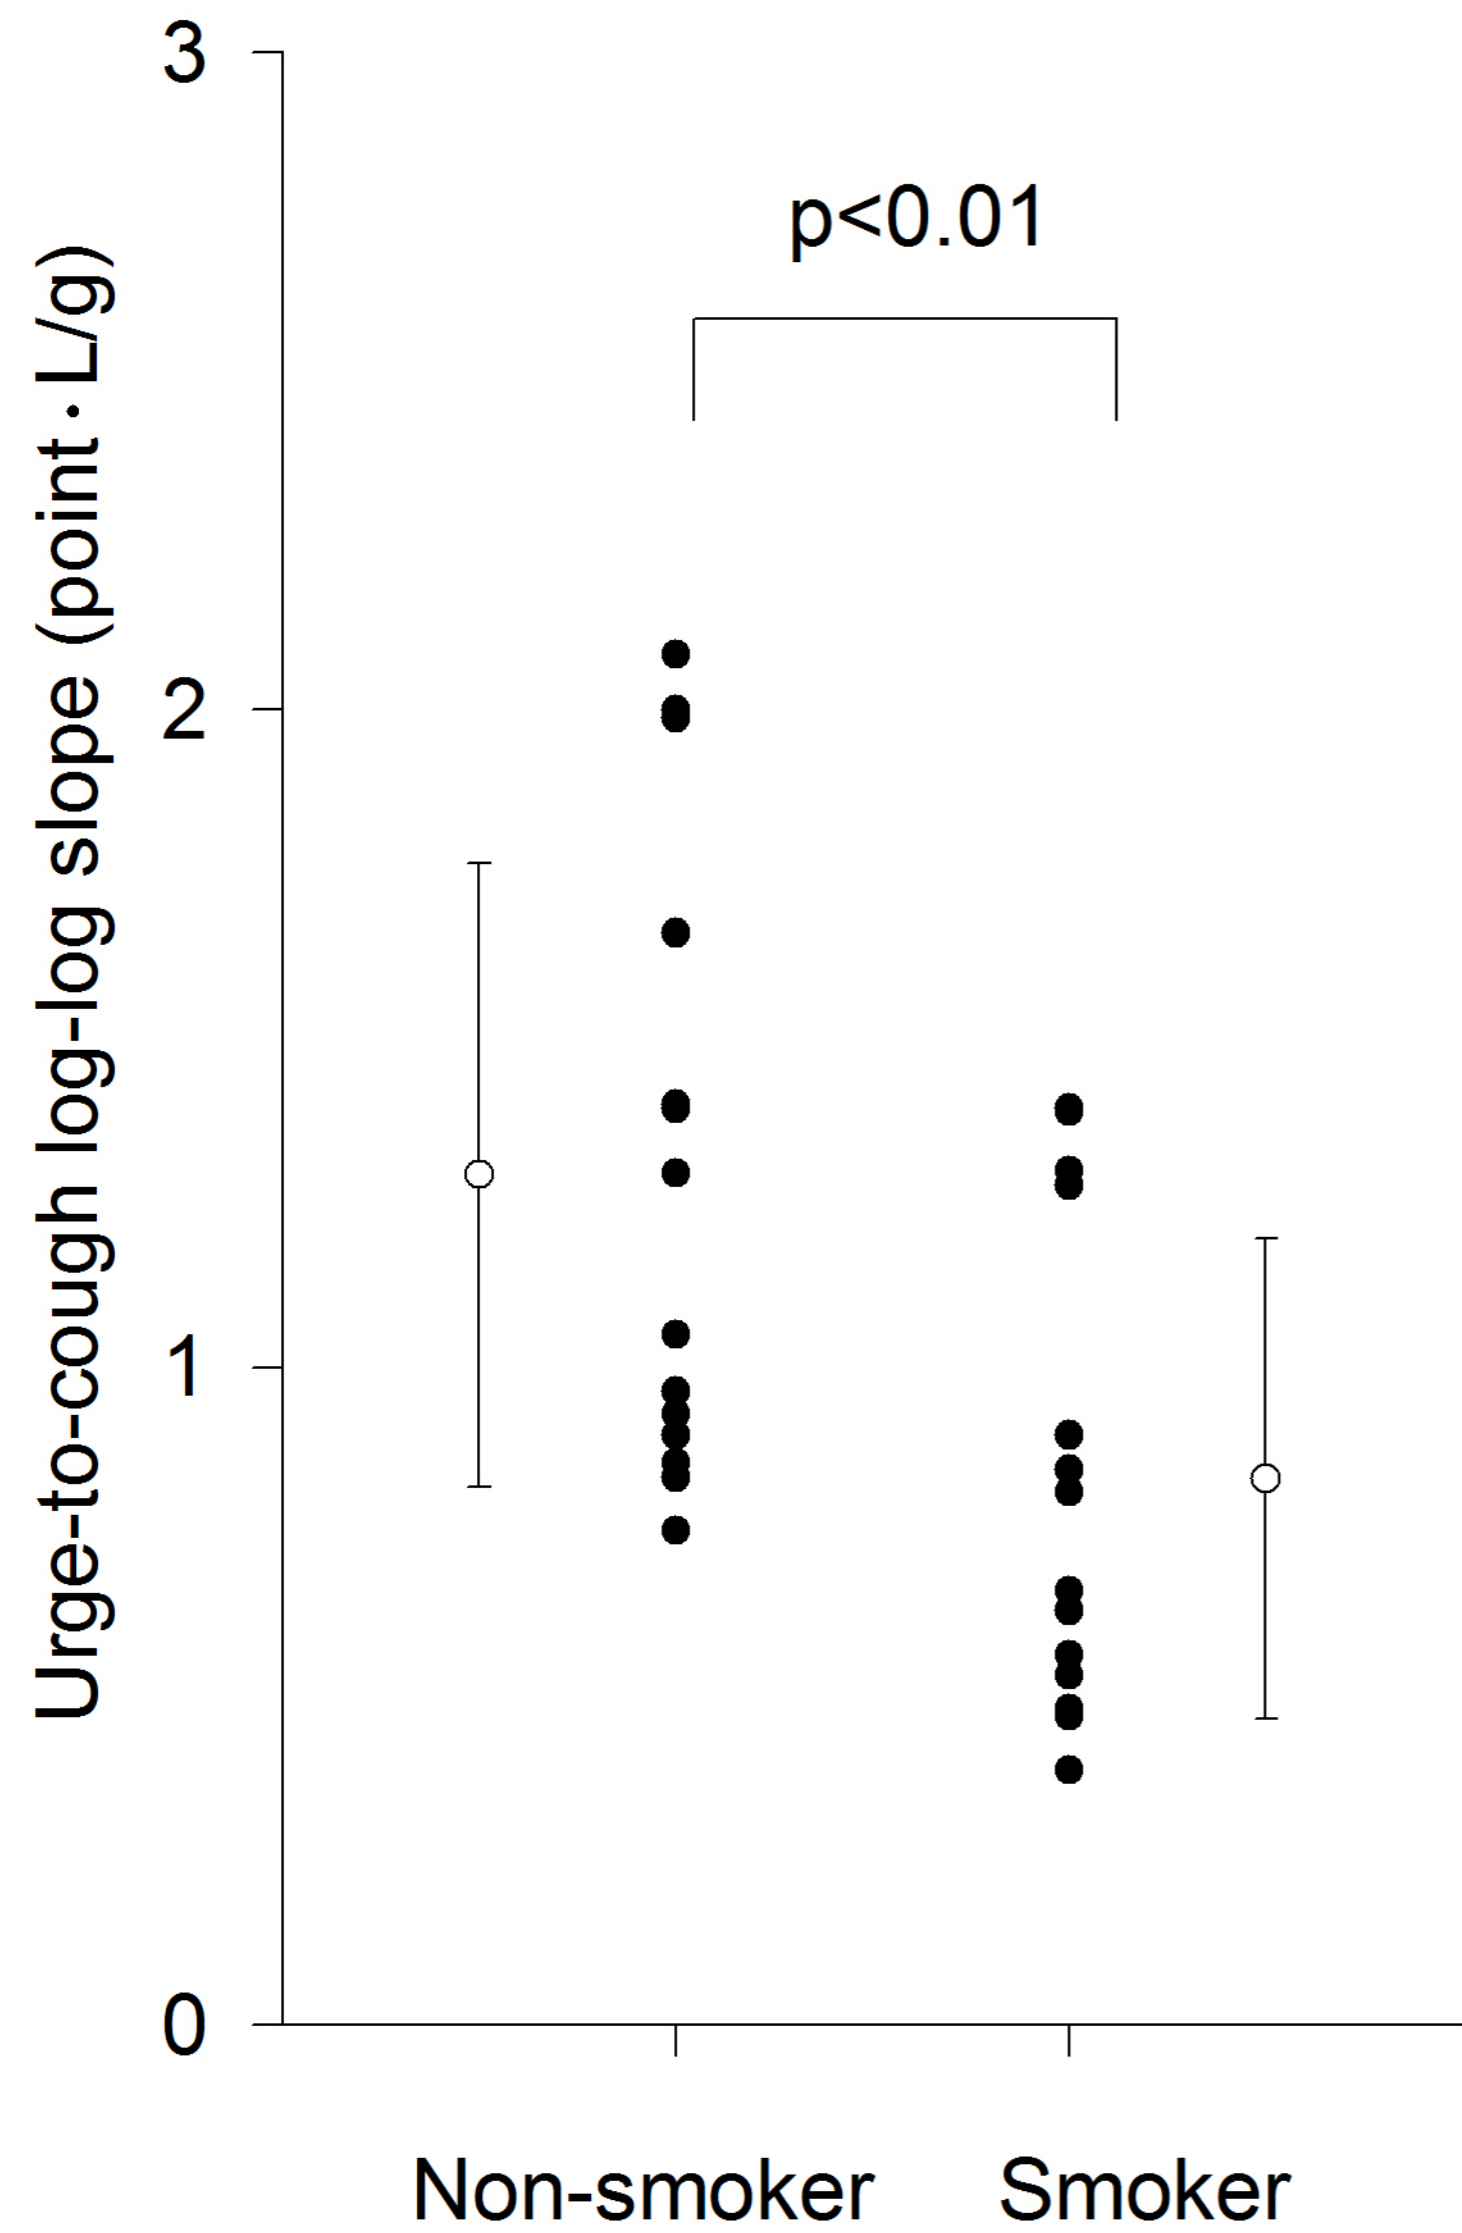**B**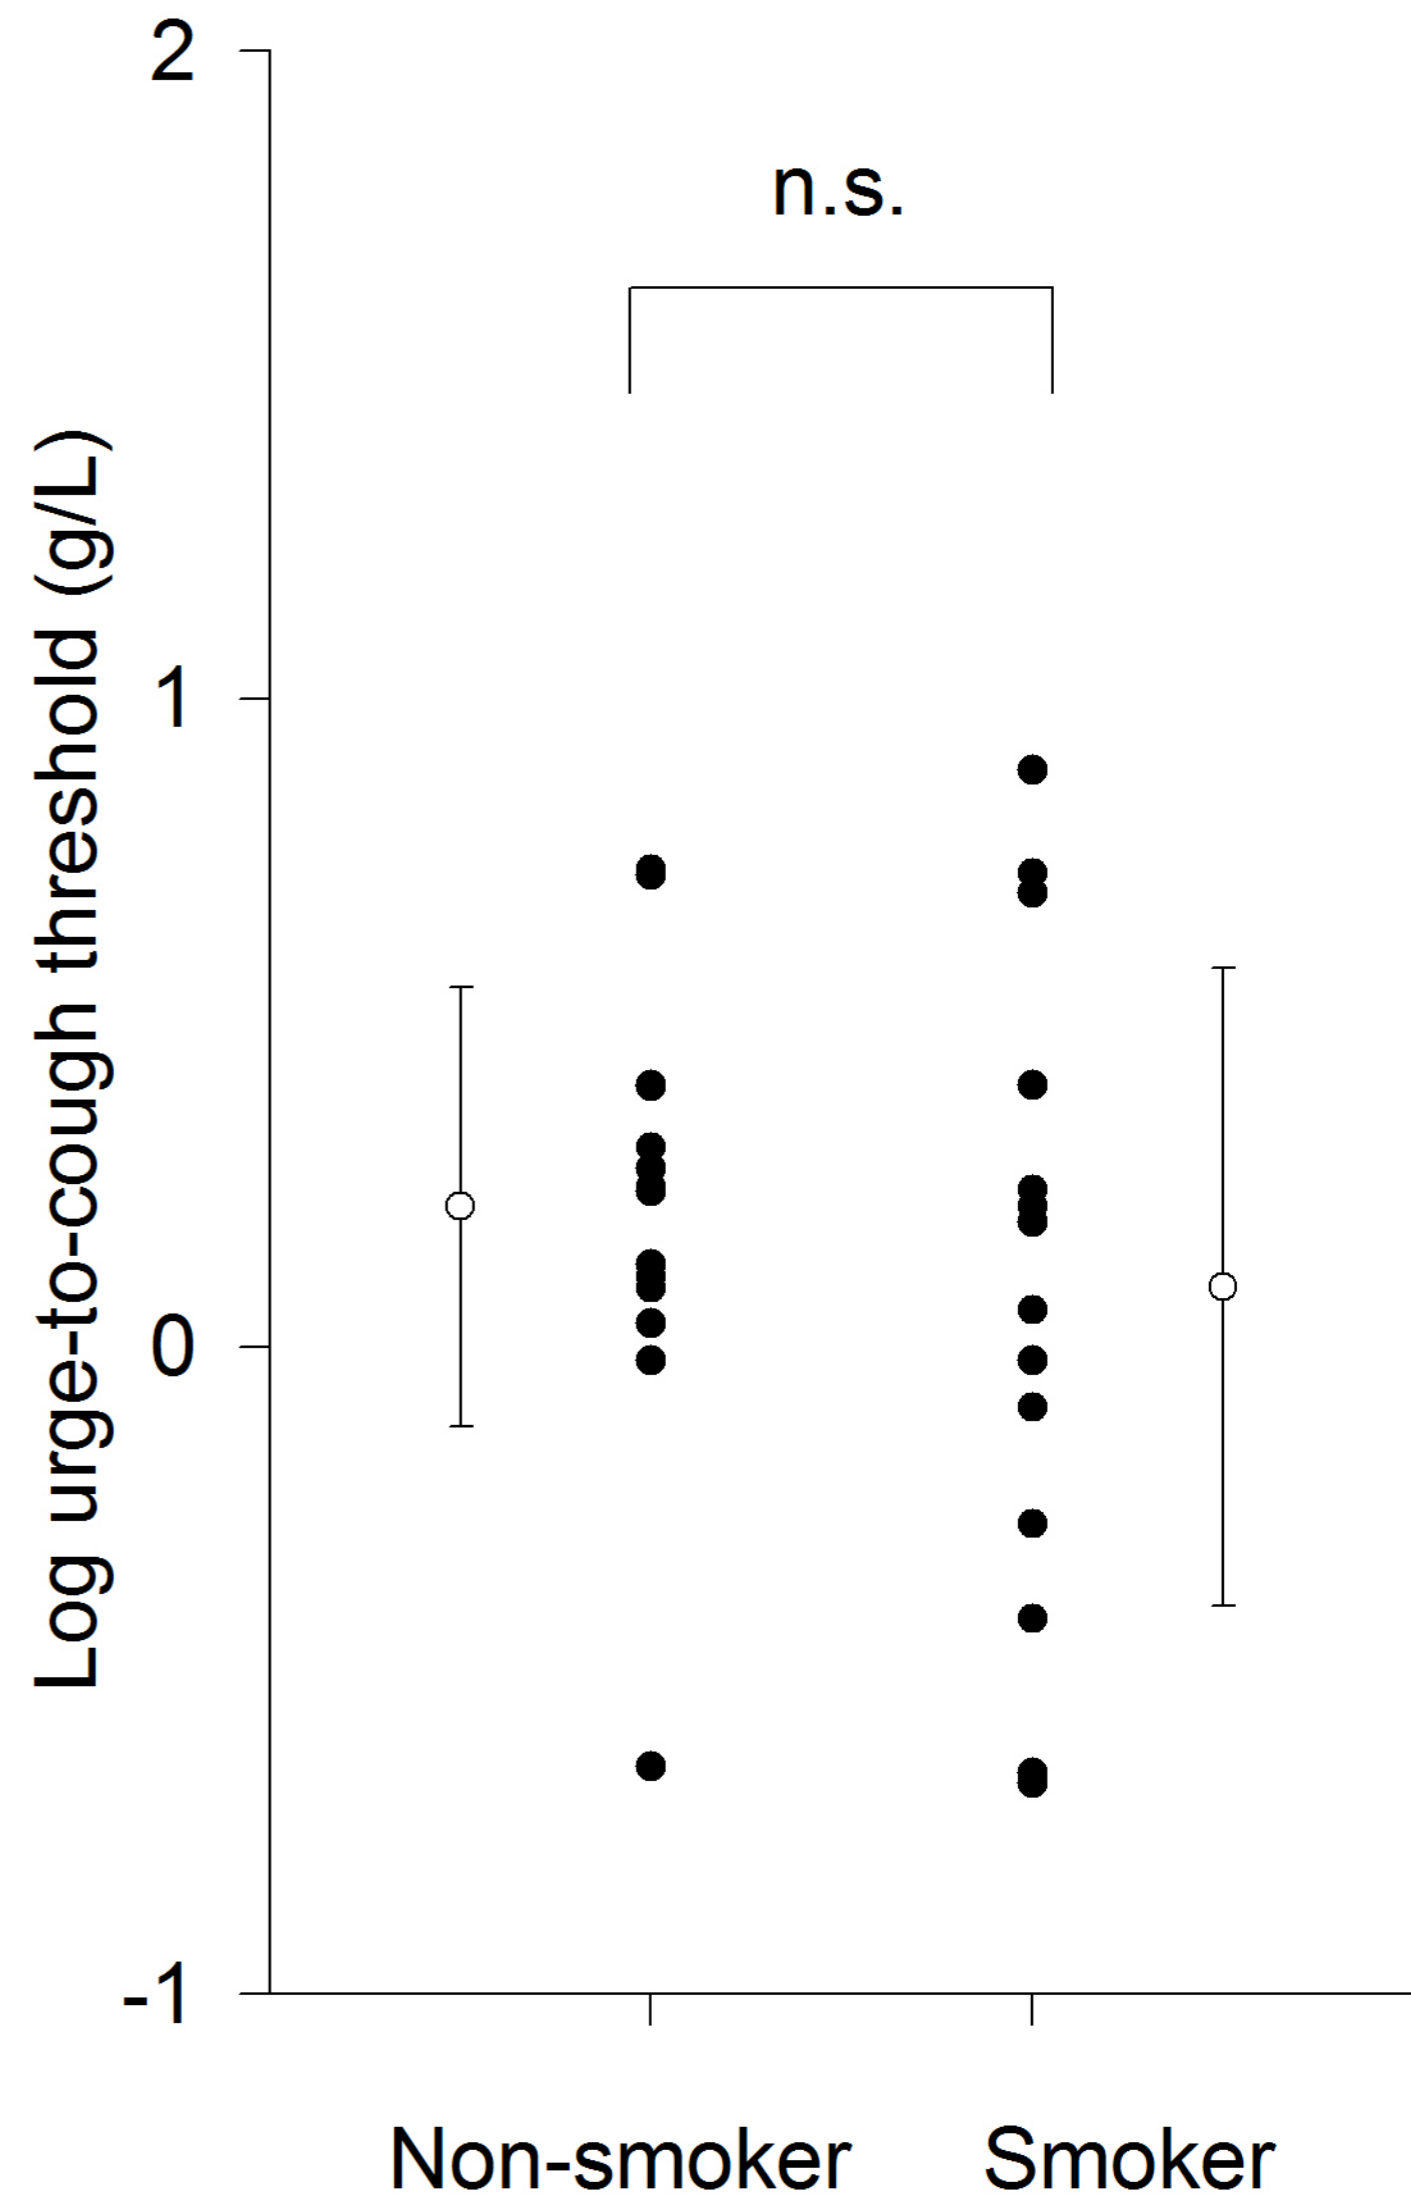

Supplement: MOESM2 [file 9623224]
